# Supplementary material for: Drinking Warm Water Improves Growth Performance and Optimizes the Gut Microbiota in Early Postweaning Rabbits during Winter
Source: PubMed Central journal article supplement (PMC6616395; doi:10.3390/ani9060346), 2019-06-12
Supplement: animals-09-00346-s001.pdf [file animals-09-00346-s001.pdf]

# Supplementary Material

## Supplementary Figures

**Figure S1.** Taxonomic alteration of cecum microbiota in rabbits from different groups at the phyla and genus level. CW, cold water group; WW, warm water group.

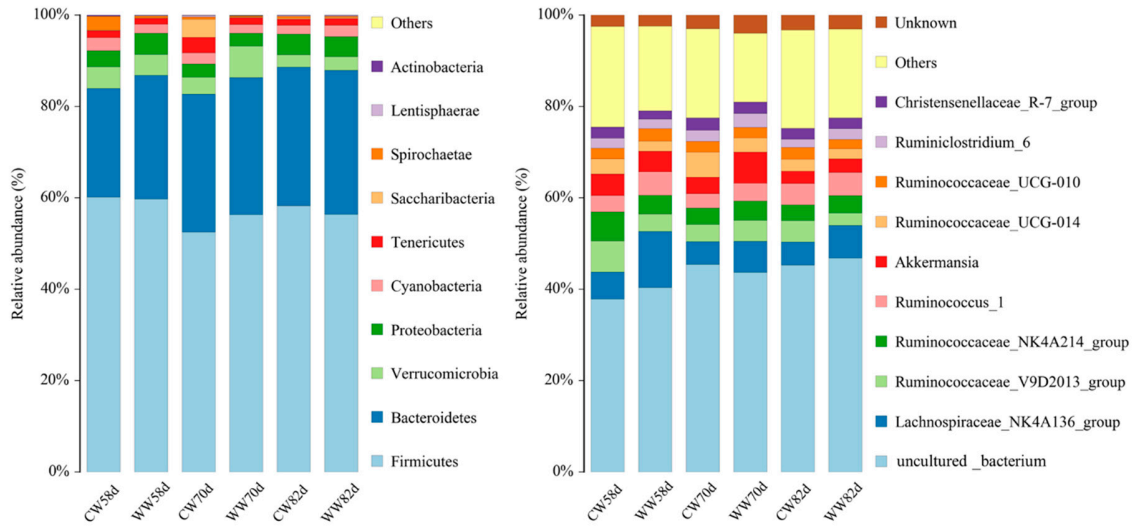

**Figure S2.** (A) Genus differentially represented between the early postweaning (day 58) and subadult rabbits (day 82) identified by LEfSe (linear discriminant analysis score >2,  $P < 0.05$ ). (B) Significantly different genera among the early postweaning (day 58) and subadult rabbits (day 82) are shown, with  $P < 0.05$  by Wilcoxon rank-sum test. CW, cold water group; WW, warm water group.

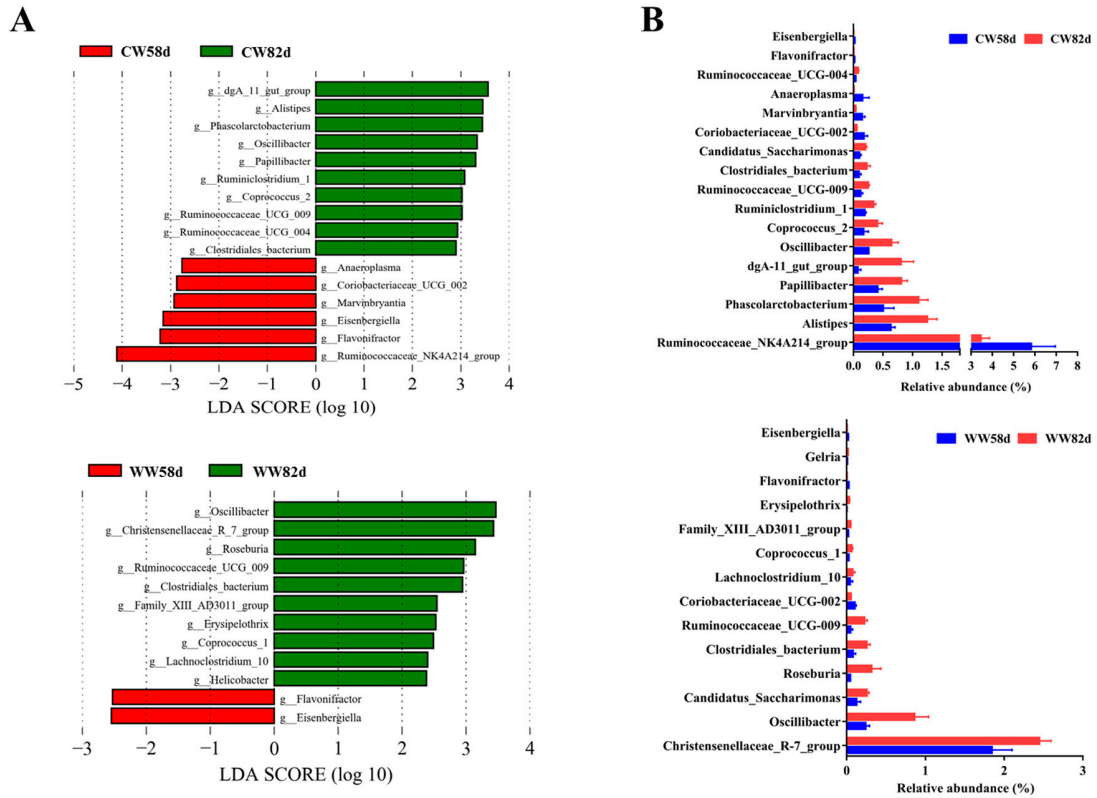

## Supplementary Tables

**Table S1.** Composition of the basal diets

| Item                    | Content | Item                          | Content |
|-------------------------|---------|-------------------------------|---------|
| Ingredients             |         | Chemical composition          |         |
| Alfalfa meal            | 31.80   | Dry matter (g/kg feed)        | 868.00  |
| Corn                    | 27.60   | Crude protein (g/kg DM)       | 202.00  |
| Soybean meal            | 17.70   | Neutral detergent fibre (g/kg | 318.00  |
| Wheat bran              | 20.00   | Ether extract (g/kg DM)       | 30.00   |
| Premix <sup>a</sup>     | 0.15    | Digestible energy (MJ/kg      | 11.89   |
| Salt                    | 0.40    | Ca (g/kg DM)                  | 10.40   |
| Limestone               | 0.39    | Total phosphorus (g/kg DM)    | 7.40    |
| dl-Methionine           | 0.41    | Lysine (g/kg DM)              | 9.80    |
| Lysine                  | 0.05    | Methionine + cysteine (g/kg   | 9.30    |
| Calcium hydro phosphate | 1.30    | Threonine (g/kg DM)           | 9.20    |
| Threonine               | 0.20    |                               |         |
| Total                   | 100.00  |                               |         |

<sup>a</sup> Premix provided per kg of diet: 12 000 IU of vitamin A; 2500 IU of vitamin D3; 40 mg of vitamin E; 2.0 mg of vitamin K; 2.0 mg of vitamin B1; 4 mg of vitamin B2; 2.0 mg of vitamin B6; 0.01 mg of vitamin B12; 0.06 mg of biotin; 50 mg of niacin; 0.3 mg of folic acid; 10 mg of d-pantothenic acid; 1000 mg of choline; 40 mg of Zn; 10 mg of Cu; 30 mg of Mn; 50 mg of Fe; 0.5 mg of I; 0.2 mg of Se; 0.5 mg of Co.

**Table S2.** Primers used for PCR

| Gene           | Forward primer<br>(5' to 3') | reverse primer<br>(5' to 3') |
|----------------|------------------------------|------------------------------|
| TGF- $\beta$ 1 | CACAGCATGAACCGACCCTTC        | AGTTGGCGTGGTAGCCCTTG         |
| IL-1 $\beta$   | GCCGATGGTCCCAATTACAT         | TCCAGAGCCACAACGACTGA         |
| IL-10          | AAGCCTTGTCGGAGATGAT          | GCTTTGTAGACGCCTTCCTC         |
| IL-12          | ACCTCCTCTATGGTGACCC          | CAGCTCCACTGTTGGAATTC         |
| pIgR2          | ACTGGTGCAAGTGAATGACC         | CGCAACCTCTTCAAACCTCGTG       |
| GR $\alpha$    | GGGAAGGAAACTCCAGTCAGAAC      | GATTGGTGATGATTCAGCTAGCA      |
| occludin       | AGAGTCCTACAAGTCCACACCG       | TCGTAGTGGTCTTGCTCTGATCTC     |
| claudin-1      | ATAGCAATCTTTGTGGCCACTGTT     | CCGCATCTTTTGCTCCTCATC        |
| GAPDH          | TGGTGAAGGTCGGAGTGAAC         | ATGTAGTGGAGGTCAATGAATGG      |
